# Supplementary material for: Multicolored one-dimensional photonic crystal coatings with excellent mechanical robustness, strong substrate adhesion, and liquid and particle impalement resistance
Source: Royal Society of Chemistry journal article supplement (doi:10.1039/c8tc06087h), 2019-01-01
Supplement: c8tc06087h1.pdf [file c8tc06087h1.pdf]

## **Electronic Supplementary Information**

# **Multicolored One-Dimensional Photonic Crystal Coatings with Excellent Mechanical Robustness, Strong Substrate Adhesion, Liquid and Particle Impalement Resistance**

Wenbin Niu,<sup>a</sup> Lele Zhang,<sup>a</sup> Yunpeng Wang,<sup>a</sup> and Shufen Zhang<sup>\* a</sup>

State Key Lab of Fine Chemicals, Dalian University of Technology, West Campus, 2

Linggong Rd., Dalian 116024, China

\*Corresponding author

E-mail address: [Zhangshf@dlut.edu.cn](mailto:Zhangshf@dlut.edu.cn)

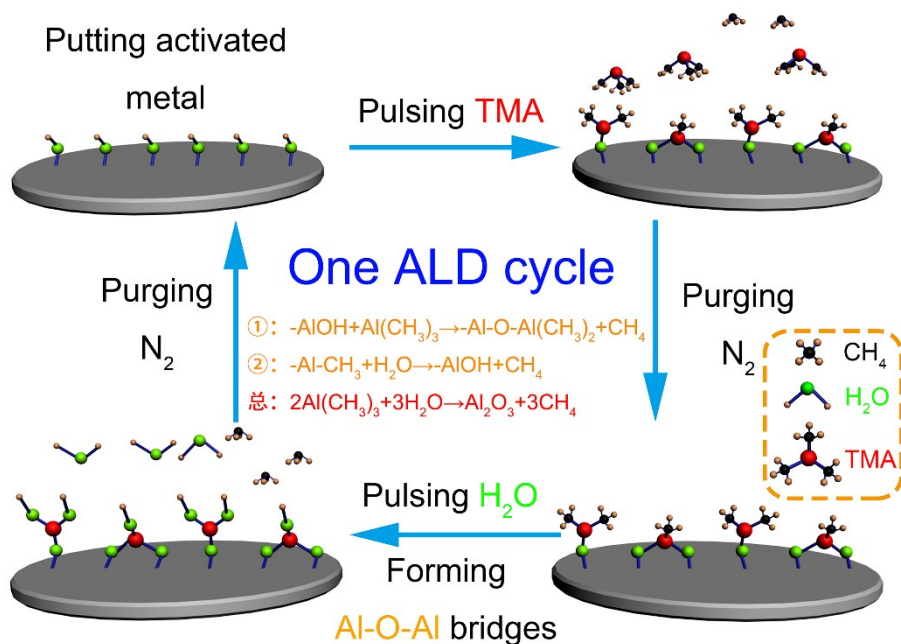

Fig. S1 Schematic illustration of ALD mechanism using  $Al_2O_3$  as a sample, where TMA refers  $Al(CH_3)_3$ .

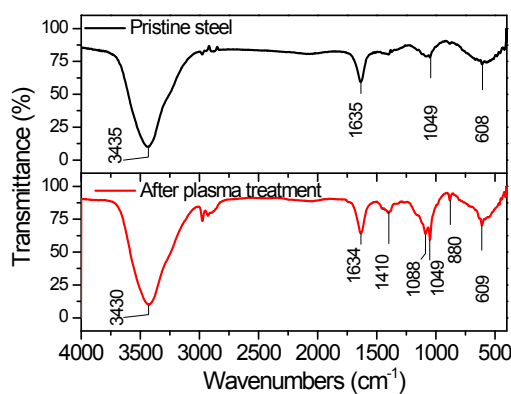

Fig. S2 FT-IR spectra of steel before and after surface air plasma treatment. After plasma treatment, the relative absorption bands at 1401 and 1088  $cm^{-1}$ , ascribing to the stretching vibrations of C-N and C-O band respectively, increased remarkably, indicating the introduction of active functional groups for the following ALD reaction. This result was further supported by next water contact angle measurement.

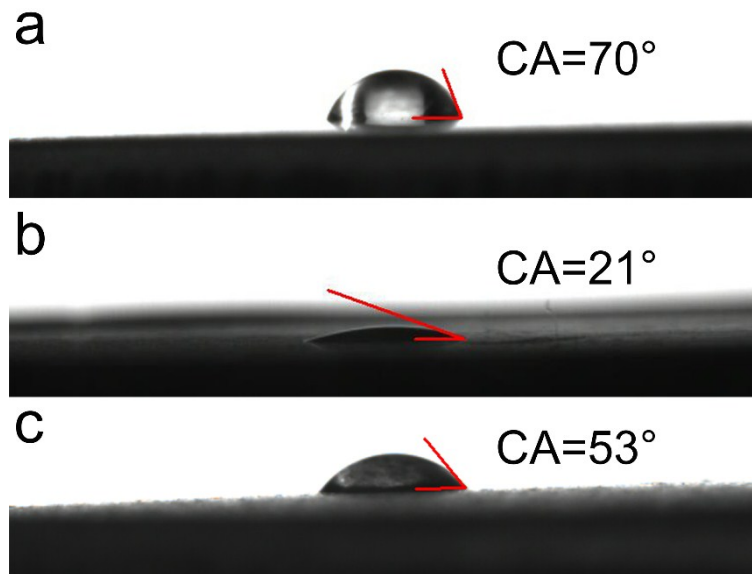

Fig. S3 Water contact angles of (a) pristine, (b) plasma treated, and (c) ALD deposited structural color steels.

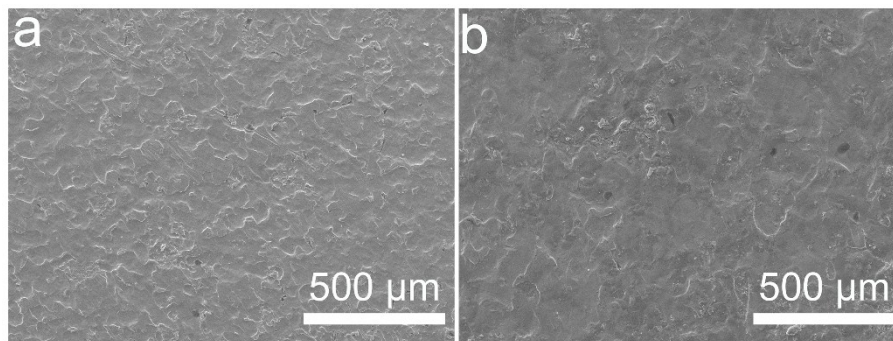

Fig. S4 Top-view SEM images of (a) pristine steel (b) photonic crystal structural color coating of Fe-3(400+400) sample.

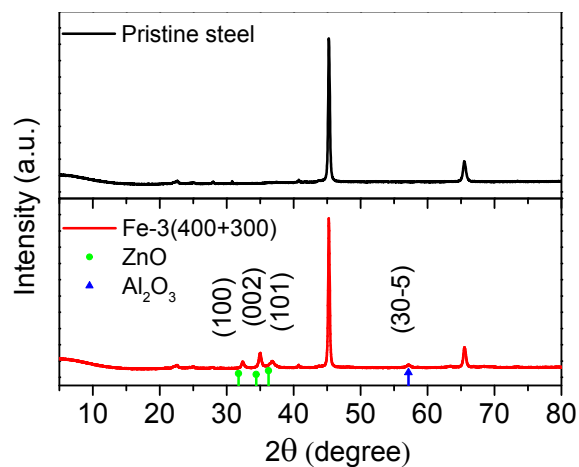

Fig. S5 XRD patterns of the pristine steel and Fe-3(400+300) sample. The diffractive peaks of Fe-3(400+300) agree well the standard with hexagonal ZnO (JCPDS No.36-1451) and monoclinic Al<sub>2</sub>O<sub>3</sub> (JCPDS No.50-1496). The peaks at 32, 35, 36 degree are ascribed to (1 0 0) , (0 0 2) and (1 0 1) facets of ZnO, respectively. The one at 57 degree is attributed to (3 0 -5) facet of Al<sub>2</sub>O<sub>3</sub>.

Tab. S1 Comparison of the theoretical bandgap wavelengths and the measured reflection peaks of structural color coatings.

| Sample        | Film thickness (nm)            |     | Theoretical bandgap wavelength (nm) | Reflection peak wavelength (nm) |
|---------------|--------------------------------|-----|-------------------------------------|---------------------------------|
|               | Al <sub>2</sub> O <sub>3</sub> | ZnO |                                     |                                 |
| Fe-3(400+300) | 62                             | 64  | 454                                 | 456                             |
| Fe-3(400+400) | 62                             | 84  | 532                                 | 536                             |
| Fe-3(400+500) | 62                             | 97  | 583                                 | 590                             |
| Fe-3(400+600) | 62                             | 115 | 653                                 | 655                             |
| Fe-3(400+700) | 62                             | 132 | 719                                 | 718.                            |

The Snell's law modified Bragg diffraction formula was given as follows:

$$k\lambda=2d(n^2-\sin^2\theta)^{1/2} \quad (1)$$

where  $\lambda$  refers the maximum reflective wavelength of structural color,  $k$  is diffraction order,  $d$  denote the periodic constant,  $n_{\text{eff}}$  is the effective refractive index of periodic structure,  $\theta$  is the angle of incident light. Increasing the angle of incident light  $\theta$  would cause the blue shift of the maximum reflective wavelength.

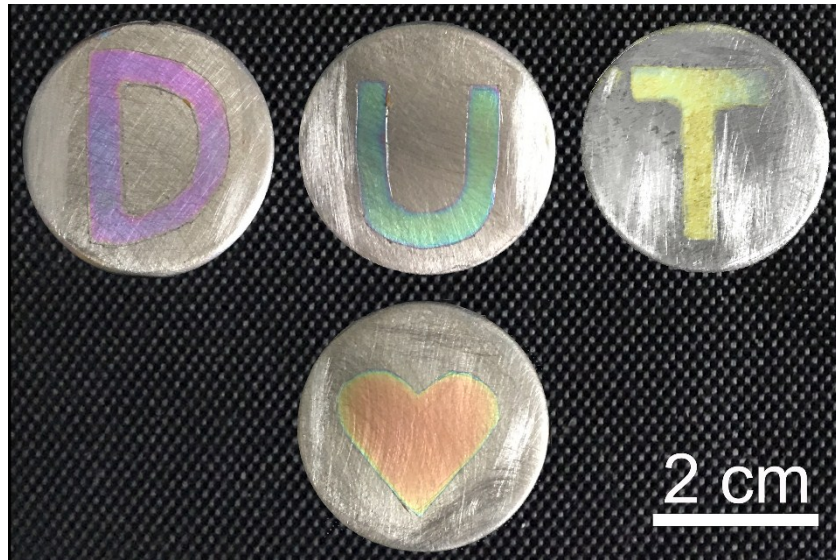

Fig. S6 Digital photos of patterned photonic crystal coatings.

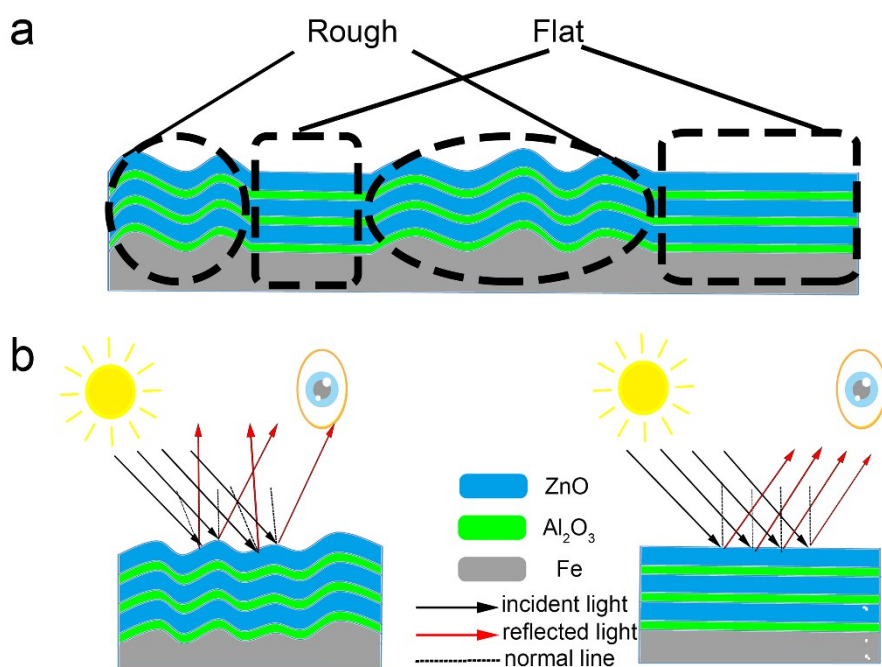

Fig. S7 Schematic illustration of (a) the microscopic surface of 1D photonic crystal coating on steel, and (b) the corresponding Bragg reflection on rough and flat regions.

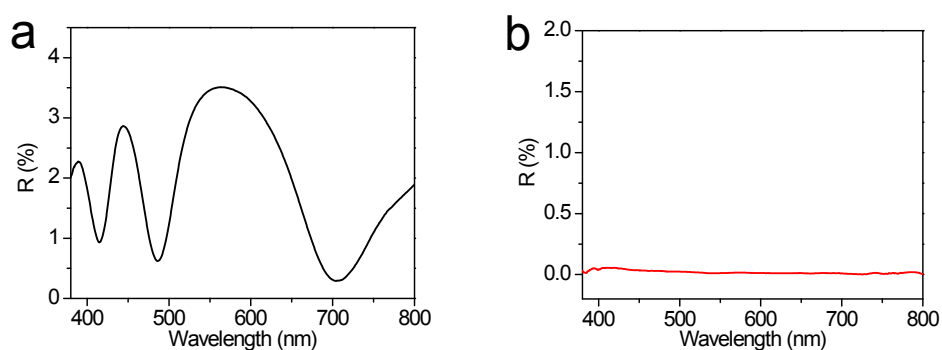

Fig. S8 Reflective spectra of 1D photonic crystal coating on silicon wafer when the incident and detection angle are (a) equal and (b) different.

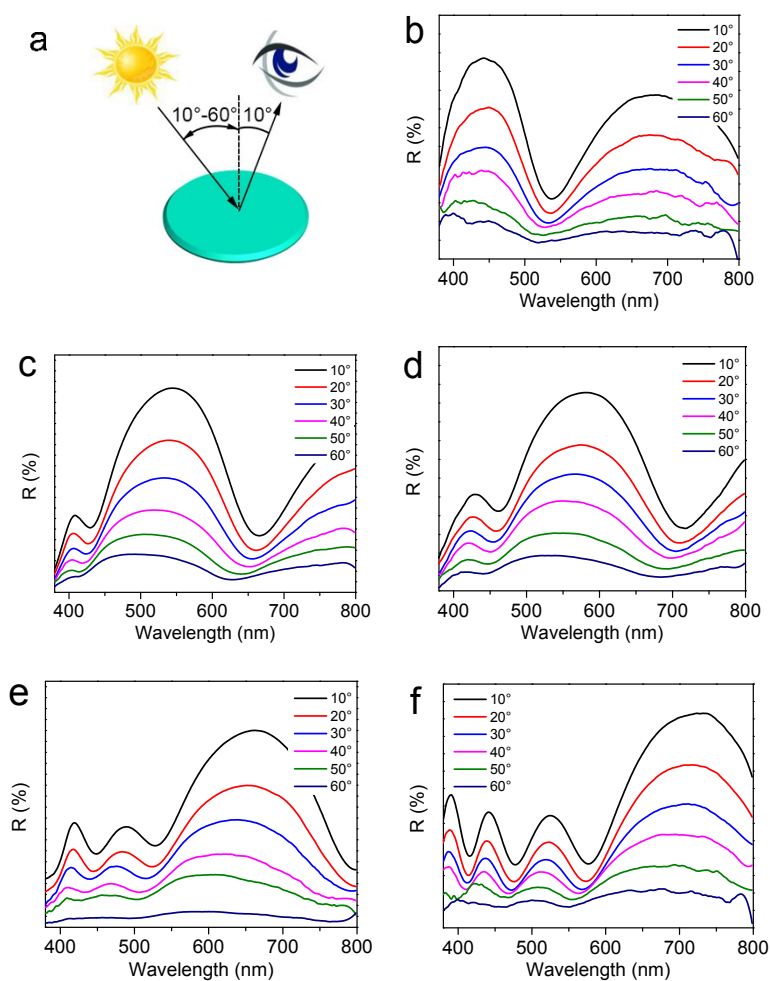

Fig. S9 Angle-resolved reflection spectra in diffusive reflection mode. (a) Illustration of measuring mode. The detection angle was fixed at  $10^\circ$  while the incident angle varied from  $10^\circ$  to  $60^\circ$ . Reflection spectra of (b) Fe-3(400+300), (c) Fe-3(400+400), (d) Fe-3(400+500), (e) Fe-3(400+600) and (f) Fe-3 (400+700).



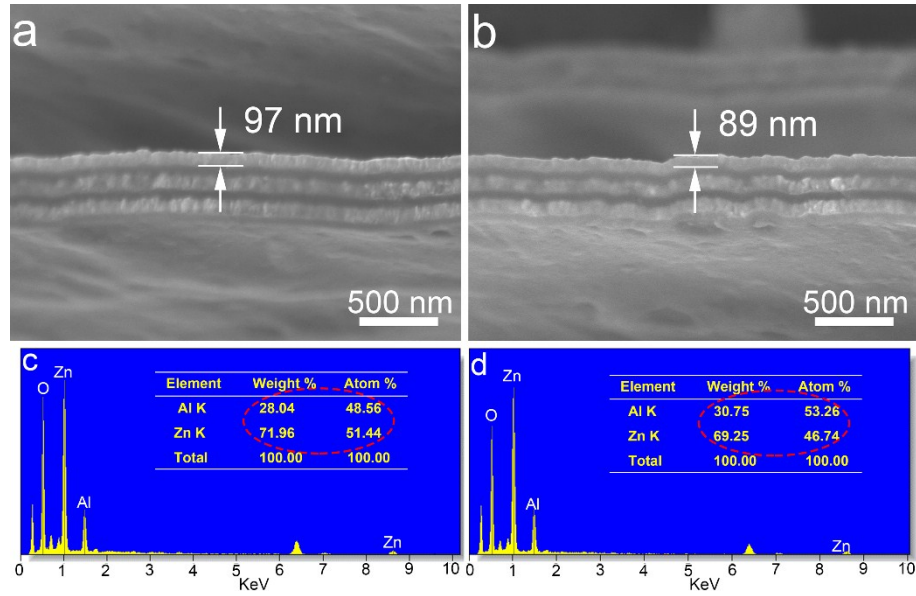

Fig. S10 Cross-sectional FESEM images of Fe-3(400+500) photonic crystal coating before and after tape peeling test: (a) before test, (b) after test and EDS spectrum: (c) before test, (d) after test.

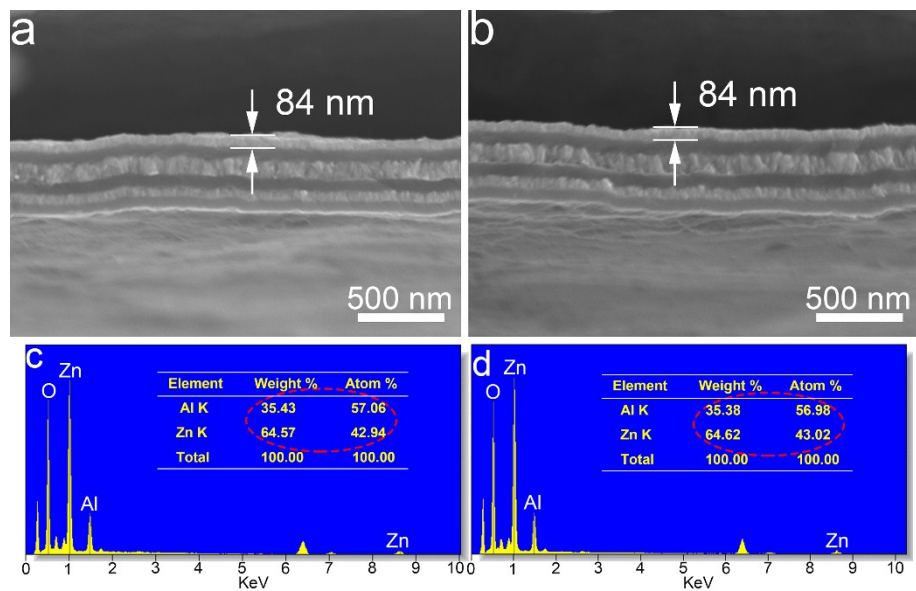

Fig. S11 Cross-sectional FESEM images of Fe-3(400+400) photonic crystal coating before and after tape peeling test: (a) before test (b) after test and EDS spectrum: (c) before test (d) after test.



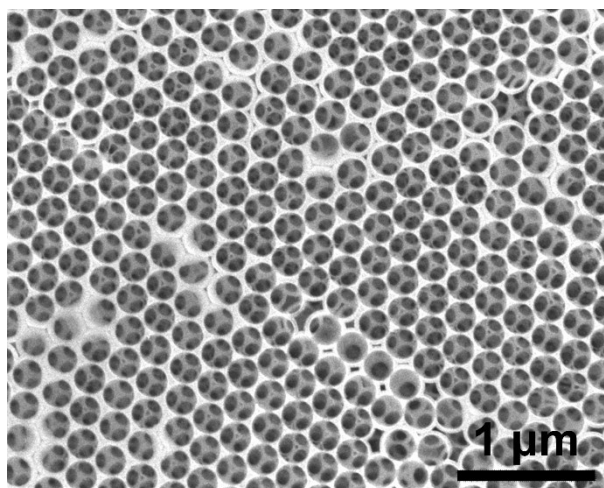

Fig. S12 FESEM images of TiO<sub>2</sub> inverse opal photonic crystal fabricated by atomic layer deposition.
